# Supplementary material for: Galactic cosmic radiation produces sex-specific, circuit-selective cognitive vulnerability: countermeasure trade-offs revealed by multi-domain assessment
Source: Research Square preprint supplement (doi:10.21203/rs.3.rs-9476558/v1), 2026-05-07
Supplement: Supplementary file 1 [file 4de57365bce4e8d942d66db3.pdf]

# Galactic cosmic radiation produces sex-specific, circuit-selective cognitive vulnerability: countermeasure trade-offs revealed by multi-domain assessment

Sheridan A. O'Connor,<sup>1,2,3</sup> Pragatee Narain,<sup>1^</sup> Amishi Mahajan,<sup>1,4^</sup> Grace L. Bancroft,<sup>1,4^</sup> Harley A. Haas,<sup>1,4^</sup> Elise Wallen-Friedman,<sup>1,4</sup> Shubha Vasisht,<sup>1,4</sup> Hajime Takano,<sup>5</sup> Frederico C. Kiffer,<sup>1</sup> Amelia J. Eisch,<sup>1,6-8</sup> Sanghee Yun<sup>1,7,8\*</sup>

*^Equal contribution, \*Corresponding author*

<sup>1</sup>Department of Anesthesiology and Critical Care Medicine, The Children's Hospital of Philadelphia (CHOP) Research Institute, Philadelphia, PA, USA

<sup>2</sup>Department of Pathobiology, University of Pennsylvania School of Veterinary Medicine, Philadelphia, PA, USA

<sup>3</sup>Department of University Laboratory Animal Resources, University of Pennsylvania, Philadelphia, PA, USA

<sup>4</sup>University of Pennsylvania, School of Arts and Sciences, Philadelphia, PA, USA

<sup>5</sup>Division of Neurology, The Children's Hospital of Philadelphia (CHOP) Research Institute, Philadelphia, PA, USA

<sup>6</sup>Department of Neuroscience, University of Pennsylvania Perelman School of Medicine, Philadelphia, PA, USA

<sup>7</sup>Neuroscience Graduate Group, University of Pennsylvania Perelman School of Medicine, Philadelphia, PA, USA

<sup>8</sup>Department of Anesthesiology and Critical Care Medicine, University of Pennsylvania Perelman School of Medicine, Philadelphia, PA, USA

**Supplementary Fig1.**

**Supplementary Table 1.**

**Supplementary Table 2.**

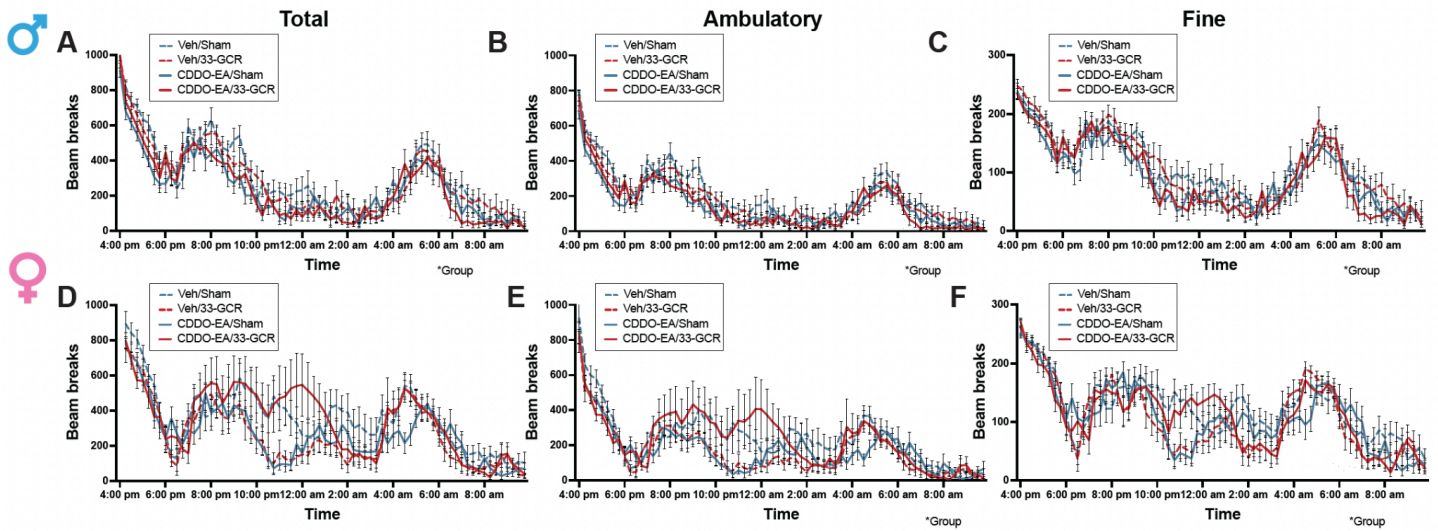

**Supplementary Fig1. CDDO-EA reduces locomotor activity across the circadian cycle in both sexes.** (A–F) Locomotor activity measured over 18 hours (4pm–10am) via photobeam breaks in 15-minute bins in males (A–C) and females (D–F). Total activity (A, D), ambulatory activity (B, E), and fine activity (C, F). Data are presented as mean  $\pm$  SEM ( $n=10-12$ /group). Statistical analysis: 2-way ANOVA (IRR  $\times$  Drug) on summed light phase (4pm–7pm, 7am–10am) and dark phase (7pm–7am) data. \* $p<0.05$ . Post-hoc: Veh/Sham vs CDDO-EA/Sham, <sup>b</sup>  $p<0.05$ , <sup>b'</sup>  $p<0.01$ ; Veh/Sham vs CDDO-EA/33-GCR, <sup>c</sup>  $p<0.05$ ; Veh/33-GCR vs CDDO-EA/Sham, <sup>d</sup>  $p<0.05$ ; #  $0.05<p<0.08$ . Complete subject numbers and detailed statistical analyses are provided in Supplementary Table 1.

Supplementary Table 1. Statistical analysis

| Experiment          | Measure             | Test Phase | Leaf (D/F/Cl) | Flown Panel | Group         | Sample Size (n) | Mean (predicted or min)/or Median | Passed Normality Test? | Test Statistic | Max. Effect Detection (Red Test: P<0.05) | Dist. Value (p.h. D/d) | Max. Effect Value (Red Test: P<0.05) | % of Best Connection | Group Difference P-Value (Boldface: P<0.05) | Lower Bound of Interval of P-Value (Red Test: P<0.05) | Upper Bound of Interval of P-Value (Red Test: P<0.05) |
|---------------------|---------------------|------------|---------------|-------------|---------------|-----------------|-----------------------------------|------------------------|----------------|------------------------------------------|------------------------|--------------------------------------|----------------------|---------------------------------------------|-------------------------------------------------------|-------------------------------------------------------|
| Main d-SLR Sample   | % object separation | -          | d             | 2B          | WV3Sham       | 10              | Object 1                          | Yes                    | 3-way RMANOVA  | Object                                   | F(2, 20)=0.976         | p=0.001                              |                      |                                             |                                                       |                                                       |
|                     |                     |            |               |             | WV3GCR        | 10              | Object 2                          | Yes                    | 3-way RMANOVA  | Object                                   | F(1, 30)=0.008         | p=0.979                              |                      |                                             |                                                       |                                                       |
|                     |                     |            |               |             | CCDD-EASD-GCR | 9               | Object 3                          | Yes                    | 3-way RMANOVA  | Object                                   | F(2, 20)=0.022         | p=0.972                              |                      |                                             |                                                       |                                                       |
| Main d-SLR Test     | d ratio             | -          | d             | 2C          | WV3Sham       | 10              | Object 1                          | Yes                    | 2-way ANOVA    | Object x Drug                            | F(2, 20)=0.045         | p=0.981                              |                      |                                             |                                                       |                                                       |
|                     |                     |            |               |             | WV3GCR        | 10              | Object 2                          | Yes                    | 2-way ANOVA    | Object x Drug                            | F(1, 30)=0.312         | p=0.580                              |                      |                                             |                                                       |                                                       |
|                     |                     |            |               |             | CCDD-EASD-GCR | 9               | Object 3                          | Yes                    | 2-way ANOVA    | Object x Drug                            | F(1, 30)=0.005         | p=0.987                              |                      |                                             |                                                       |                                                       |
| Main x-SLR Sample   | % object separation | -          | s             | 2F          | WV3Sham       | 10              | Object 1                          | Yes                    | 3-way RMANOVA  | Object                                   | F(2, 20)=1.089         | p=0.342                              |                      |                                             |                                                       |                                                       |
|                     |                     |            |               |             | WV3GCR        | 10              | Object 2                          | Yes                    | 3-way RMANOVA  | Object                                   | F(1, 30)=0.0815        | p=0.777                              |                      |                                             |                                                       |                                                       |
|                     |                     |            |               |             | CCDD-EASD-GCR | 9               | Object 3                          | Yes                    | 3-way RMANOVA  | Object                                   | F(2, 20)=0.008         | p=0.980                              |                      |                                             |                                                       |                                                       |
| Main x-SLR Test     | d ratio             | -          | s             | 2G          | WV3Sham       | 10              | Object 1                          | Yes                    | 2-way ANOVA    | Object x Drug                            | F(2, 20)=0.883         | p=0.410                              |                      |                                             |                                                       |                                                       |
|                     |                     |            |               |             | WV3GCR        | 10              | Object 2                          | Yes                    | 2-way ANOVA    | Object x Drug                            | F(1, 30)=0.483         | p=0.482                              |                      |                                             |                                                       |                                                       |
|                     |                     |            |               |             | CCDD-EASD-GCR | 9               | Object 3                          | Yes                    | 2-way ANOVA    | Object x Drug                            | F(1, 30)=0.000         | p=0.987                              |                      |                                             |                                                       |                                                       |
| Main x-SLR Test     | Locomotion          | -          | s             | 2H          | WV3Sham       | 10              | Object 1                          | Yes                    | 2-way ANOVA    | Object                                   | F(1, 30)=0.270         | p=0.607                              |                      |                                             |                                                       |                                                       |
|                     |                     |            |               |             | WV3GCR        | 10              | Object 2                          | Yes                    | 2-way ANOVA    | Object                                   | F(1, 30)=4.242         | p=0.047                              |                      |                                             |                                                       |                                                       |
|                     |                     |            |               |             | CCDD-EASD-GCR | 9               | Object 3                          | Yes                    | 2-way ANOVA    | Object                                   | F(1, 30)=0.078         | p=0.789                              |                      |                                             |                                                       |                                                       |
| Main x-SLR Sample   | % object separation | -          | s             | 2J          | WV3Sham       | 10              | Object 1                          | Yes                    | 3-way RMANOVA  | Object                                   | F(2, 20)=0.454         | p=0.637                              |                      |                                             |                                                       |                                                       |
|                     |                     |            |               |             | WV3GCR        | 10              | Object 2                          | Yes                    | 3-way RMANOVA  | Object                                   | F(1, 30)=3.226         | p=0.081                              |                      |                                             |                                                       |                                                       |
|                     |                     |            |               |             | CCDD-EASD-GCR | 9               | Object 3                          | Yes                    | 3-way RMANOVA  | Object                                   | F(2, 20)=0.800         | p=0.457                              |                      |                                             |                                                       |                                                       |
| Main x-SLR Test     | d ratio             | -          | s             | 2K          | WV3Sham       | 10              | Object 1                          | Yes                    | 2-way ANOVA    | Object                                   | F(1, 30)=1.130         | p=0.295                              |                      |                                             |                                                       |                                                       |
|                     |                     |            |               |             | WV3GCR        | 10              | Object 2                          | Yes                    | 2-way ANOVA    | Object                                   | F(1, 30)=4.567         | p=0.040                              |                      |                                             |                                                       |                                                       |
|                     |                     |            |               |             | CCDD-EASD-GCR | 9               | Object 3                          | Yes                    | 2-way ANOVA    | Object                                   | F(1, 30)=0.000         | p=0.987                              |                      |                                             |                                                       |                                                       |
| Main x-SLR Test     | Locomotion          | -          | s             | 2L          | WV3Sham       | 10              | Object 1                          | Yes                    | 2-way ANOVA    | Object                                   | F(1, 30)=0.008         | p=0.971                              |                      |                                             |                                                       |                                                       |
|                     |                     |            |               |             | WV3GCR        | 10              | Object 2                          | Yes                    | 2-way ANOVA    | Object                                   | F(1, 30)=0.816         | p=0.373                              |                      |                                             |                                                       |                                                       |
|                     |                     |            |               |             | CCDD-EASD-GCR | 9               | Object 3                          | Yes                    | 2-way ANOVA    | Object                                   | F(1, 30)=0.000         | p=0.985                              |                      |                                             |                                                       |                                                       |
| Fringe d-SLR Sample | % object separation | -          | d             | 3B          | WV3Sham       | 12              | Object 1                          | Yes                    | 3-way RMANOVA  | Object                                   | F(2, 20)=3.883         | p=0.044                              |                      |                                             |                                                       |                                                       |
|                     |                     |            |               |             | WV3GCR        | 12              | Object 2                          | Yes                    | 3-way RMANOVA  | Object                                   | F(1, 40)=0.000         | p=0.985                              |                      |                                             |                                                       |                                                       |
|                     |                     |            |               |             | CCDD-EASD-GCR | 11              | Object 3                          | Yes                    | 3-way RMANOVA  | Object                                   | F(2, 20)=1.000         | p=0.358                              |                      |                                             |                                                       |                                                       |
| Fringe d-SLR Test   | d ratio             | -          | d             | 3C          | WV3Sham       | 12              | Object 1                          | Yes                    | 2-way ANOVA    | Object                                   | F(1, 40)=0.204         | p=0.591                              |                      |                                             |                                                       |                                                       |
|                     |                     |            |               |             | WV3GCR        | 12              | Object 2                          | Yes                    | 2-way ANOVA    | Object                                   | F(1, 40)=1.453         | p=0.238                              |                      |                                             |                                                       |                                                       |
|                     |                     |            |               |             | CCDD-EASD-GCR | 11              | Object 3                          | Yes                    | 2-way ANOVA    | Object                                   | F(1, 40)=12.711        | p=0.007                              |                      |                                             |                                                       |                                                       |
| Fringe x-SLR Sample | % object separation | -          | s             | 3F          | WV3Sham       | 12              | Object 1                          | Yes                    | 3-way RMANOVA  | Object                                   | F(2, 20)=0.529         | p=0.581                              |                      |                                             |                                                       |                                                       |
|                     |                     |            |               |             | WV3GCR        | 12              | Object 2                          | Yes                    | 3-way RMANOVA  | Object                                   | F(1, 40)=0.005         | p=0.959                              |                      |                                             |                                                       |                                                       |
|                     |                     |            |               |             | CCDD-EASD-GCR | 11              | Object 3                          | Yes                    | 3-way RMANOVA  | Object                                   | F(2, 20)=0.054         | p=0.972                              |                      |                                             |                                                       |                                                       |
| Fringe x-SLR Test   | d ratio             | -          | s             | 3G          | WV3Sham       | 12              | Object 1                          | Yes                    | 2-way ANOVA    | Object                                   | F(1, 40)=0.188         | p=0.670                              |                      |                                             |                                                       |                                                       |
|                     |                     |            |               |             | WV3GCR        | 12              | Object 2                          | Yes                    | 2-way ANOVA    | Object                                   | F(1, 40)=0.031         | p=0.861                              |                      |                                             |                                                       |                                                       |
|                     |                     |            |               |             | CCDD-EASD-GCR | 11              | Object 3                          | Yes                    | 2-way ANOVA    | Object                                   | F(1, 40)=0.270         | p=0.602                              |                      |                                             |                                                       |                                                       |
| Fringe x-SLR Test   | Locomotion          | -          | s             | 3H          | WV3Sham       | 12              | Object 1                          | Yes                    | 2-way ANOVA    | Object                                   | F(1, 40)=0.015         | p=0.914                              |                      |                                             |                                                       |                                                       |
|                     |                     |            |               |             | WV3GCR        | 12              | Object 2                          | Yes                    | 2-way ANOVA    | Object                                   | F(1, 40)=0.872         | p=0.358                              |                      |                                             |                                                       |                                                       |
|                     |                     |            |               |             | CCDD-EASD-GCR | 11              | Object 3                          | Yes                    | 2-way ANOVA    | Object                                   | F(1, 40)=0.002         | p=0.989                              |                      |                                             |                                                       |                                                       |
| Fringe x-SLR Sample | % object separation | -          | s             | 3J          | WV3Sham       | 12              | Object 1                          | Yes                    | 3-way RMANOVA  | Object                                   | F(2, 20)=1.027         | p=0.349                              |                      |                                             |                                                       |                                                       |
|                     |                     |            |               |             | WV3GCR        | 12              | Object 2                          | Yes                    | 3-way RMANOVA  | Object                                   | F(1, 40)=1.145         | p=0.292                              |                      |                                             |                                                       |                                                       |
|                     |                     |            |               |             | CCDD-EASD-GCR | 11              | Object 3                          | Yes                    | 3-way RMANOVA  | Object                                   | F(2, 20)=0.254         | p=0.773                              |                      |                                             |                                                       |                                                       |
| Fringe x-SLR Test   | d ratio             | -          | s             | 3K          | WV3Sham       | 12              | Object 1                          | Yes                    | 2-way ANOVA    | Object                                   | F(1, 40)=0.053         | p=0.827                              |                      |                                             |                                                       |                                                       |
|                     |                     |            |               |             | WV3GCR        | 12              | Object 2                          | Yes                    | 2-way ANOVA    | Object                                   | F(1, 40)=0.071         | p=0.805                              |                      |                                             |                                                       |                                                       |
|                     |                     |            |               |             | CCDD-EASD-GCR | 11              | Object 3                          | Yes                    | 2-way ANOVA    | Object                                   | F(1, 40)=0.1457        | p=0.719                              |                      |                                             |                                                       |                                                       |
| Fringe x-SLR Test   | Locomotion          | -          | s             | 3L          | WV3Sham       | 12              | Object 1                          | Yes                    | 2-way ANOVA    | Object                                   | F(1, 40)=0.042         | p=0.838                              |                      |                                             |                                                       |                                                       |
|                     |                     |            |               |             | WV3GCR        | 12              | Object 2                          | Yes                    | 2-way ANOVA    | Object                                   | F(1, 40)=0.119         | p=0.733                              |                      |                                             |                                                       |                                                       |
|                     |                     |            |               |             | CCDD-EASD-GCR | 11              | Object 3                          | Yes                    | 2-way ANOVA    | Object                                   | F(1, 40)=1.233         | p=0.273                              |                      |                                             |                                                       |                                                       |
| Main Animal         | Weight              | -          | -             | 4A          | WV3Sham       | 12              | Object 1                          | Yes                    | 3-way RMANOVA  | Object                                   | F(1, 43)=0.3024        | p=0.585                              |                      |                                             |                                                       |                                                       |
|                     |                     |            |               |             | WV3GCR        | 12              | Object 2                          | Yes                    | 3-way RMANOVA  | Object                                   | F(1, 43)=2.8100        | p=0.101                              |                      |                                             |                                                       |                                                       |
|                     |                     |            |               |             | CCDD-EASD-GCR | 11:10           | Object 3                          | Yes                    | 3-way RMANOVA  | Object                                   | F(1, 43)=0.01618       | p=0.901                              |                      |                                             |                                                       |                                                       |

Bonferroni







Supplementary Table 2. Sample omission

| Experiment                             | Figure | Sex         | Group       | Number of animals omitted from data analysis | Animal IDs omitted          | Reason for omission                                        | n/group | n/sex | n total | Criteria for omission                                                                                                                                                                                         |    |
|----------------------------------------|--------|-------------|-------------|----------------------------------------------|-----------------------------|------------------------------------------------------------|---------|-------|---------|---------------------------------------------------------------------------------------------------------------------------------------------------------------------------------------------------------------|----|
| Overall                                | 1      | Male        | Veh/Sham    | 0                                            | NA                          | NA                                                         | 12      | 47    | 94      | Live vs. died                                                                                                                                                                                                 |    |
|                                        |        |             | Veh/33-GCR  | 0                                            | NA                          | NA                                                         | 12      |       |         |                                                                                                                                                                                                               |    |
|                                        |        |             | CDDO/Sham   | 1                                            | 9                           | Died after locomotion - but excluded from all stats        | 11      |       |         |                                                                                                                                                                                                               |    |
|                                        |        |             | CDDO/33-GCR | 0                                            | NA                          | NA                                                         | 12      |       |         |                                                                                                                                                                                                               |    |
|                                        | 1      | Female      | Veh/Sham    | 0                                            | NA                          | NA                                                         | 12      |       |         |                                                                                                                                                                                                               |    |
|                                        |        |             | Veh/33-GCR  | 0                                            | NA                          | NA                                                         | 12      |       |         |                                                                                                                                                                                                               |    |
| Spontaneous Location Recognition (SLR) | 2      | Male        | Veh/Sham    | 2                                            | 91, 92                      | Did not reach either test or sample criteria for inclusion | 10      | 39    | 83      | <b>Sample</b> criteria: animals spent >2 sec/obj, >10 sec total exploration, and did not display unequal exploration (<3%/obj)<br><br><b>Test</b> Criteria: animals spent >1sec/obj, >5 sec total exploration |    |
|                                        |        |             | Veh/33-GCR  | 2                                            | 28, 41                      |                                                            | 10      |       |         |                                                                                                                                                                                                               |    |
|                                        |        |             | CDDO/Sham   | 2                                            | 47, 76, 9 (died)            |                                                            | 9       |       |         |                                                                                                                                                                                                               |    |
|                                        |        |             | CDDO/33-GCR | 2                                            | 49, 50                      |                                                            | 10      |       |         |                                                                                                                                                                                                               |    |
|                                        | 3      | Female      | Veh/Sham    | 0                                            | NA                          | NA                                                         | 12      |       |         |                                                                                                                                                                                                               |    |
|                                        |        |             | Veh/33-GCR  | 0                                            | NA                          | NA                                                         | 12      |       |         |                                                                                                                                                                                                               |    |
| Locomotion                             | 4      | Male        | Veh/Sham    | 0                                            | NA                          | NA                                                         | 12      | 46    | 93      | Recording integrity                                                                                                                                                                                           |    |
|                                        |        |             | Veh/33-GCR  | 0                                            | NA                          | NA                                                         | 12      |       |         |                                                                                                                                                                                                               |    |
|                                        |        |             | CDDO/Sham   | 1                                            | 10, 9 (died)                | Recording malfunction                                      | 10      |       |         |                                                                                                                                                                                                               |    |
|                                        |        |             | CDDO/33-GCR | 0                                            | NA                          | NA                                                         | 12      |       |         |                                                                                                                                                                                                               |    |
|                                        | 4      | Female      | Veh/Sham    | 0                                            | NA                          | NA                                                         | 12      |       |         |                                                                                                                                                                                                               |    |
|                                        |        |             | Veh/33-GCR  | 0                                            | NA                          | NA                                                         | 12      |       |         |                                                                                                                                                                                                               |    |
| Autoshaping                            | 5      | Male        | Veh/Sham    | 2                                            | 91, 94                      | Did not reach acquisition criteria for inclusion           | 10      | 41    | 86      | Each animal has to reach at least <b>25</b> trials in <b>2 out of 3</b> consecutive days (out of 11 total days) of acquisition training.                                                                      |    |
|                                        |        |             | Veh/33-GCR  | 1                                            | 25                          |                                                            | 11      |       |         |                                                                                                                                                                                                               |    |
|                                        |        |             | CDDO/Sham   | 1                                            | 76, 9 (died)                |                                                            | 10      |       |         |                                                                                                                                                                                                               |    |
|                                        |        |             | CDDO/33-GCR | 2                                            | 16, 50                      |                                                            | 10      |       |         |                                                                                                                                                                                                               |    |
|                                        | 6      | Female      | Veh/Sham    | 0                                            | NA                          | NA                                                         | 12      |       |         |                                                                                                                                                                                                               |    |
|                                        |        |             | Veh/33-GCR  | 0                                            | NA                          | NA                                                         | 12      |       |         |                                                                                                                                                                                                               |    |
| Elevated Plus Maze (EPM)               | 7      | Male        | CDDO/Sham   | 1                                            | 12, 28 (died)               | Did not reach acquisition criteria for inclusion           | 10      | 45    | 94      | Total distance traveled (cm) outlier test                                                                                                                                                                     |    |
|                                        |        |             | CDDO/33-GCR | 1                                            | 31                          |                                                            | 11      |       |         |                                                                                                                                                                                                               |    |
|                                        |        |             | Veh/Sham    | 0                                            | NA                          |                                                            | NA      |       |         |                                                                                                                                                                                                               | 12 |
|                                        |        |             | Veh/33-GCR  | 0                                            | NA                          |                                                            | NA      |       |         |                                                                                                                                                                                                               | 12 |
|                                        | 7      | Female      | CDDO/Sham   | 0                                            | 28 (died)                   | NA                                                         | 11      |       |         |                                                                                                                                                                                                               |    |
|                                        |        |             | CDDO/33-GCR | 0                                            | NA                          | NA                                                         | 12      |       |         |                                                                                                                                                                                                               |    |
| Double-Cortin X (DCX)                  | 10     | Male        | Veh/Sham    | 1                                            | 3                           | Not able to count DCX cells                                | 11      | 43    | 84      | Damage to L and R dentate gyrus (DG) in at least one countable brain section, or outlier on statistics                                                                                                        |    |
|                                        |        |             | Veh/33-GCR  | 2                                            | 5, 8                        |                                                            | 10      |       |         |                                                                                                                                                                                                               |    |
|                                        |        |             | CDDO/Sham   | 2                                            | 75, 12, 9 (died)            |                                                            | 9       |       |         |                                                                                                                                                                                                               |    |
|                                        |        |             | CDDO/33-GCR | 1                                            | 81                          |                                                            | 11      |       |         |                                                                                                                                                                                                               |    |
|                                        | 10     | Female      | Veh/Sham    | 0                                            | NA                          | NA                                                         | 12      |       |         |                                                                                                                                                                                                               |    |
|                                        |        |             | Veh/33-GCR  | 1                                            | 22                          | 11                                                         |         |       |         |                                                                                                                                                                                                               |    |
| 10                                     | Female | CDDO/Sham   | 1           | 11, 28 (died)                                | Not able to count DCX cells | 10                                                         |         |       |         |                                                                                                                                                                                                               |    |
|                                        |        | CDDO/33-GCR | 4           | 16, 29, 46, 48                               | 8                           |                                                            |         |       |         |                                                                                                                                                                                                               |    |
